# Supplementary material
Source: PubMed Central journal article supplement (PMC7008943)
Supplement: NIHMS930141-supplement-Figure_S1.pdf [file NIHMS930141-supplement-Figure_S1.pdf]

**Figures 1a-d.** Mean levels of psychological well-being in balanced, over-benefiting, and under-benefiting groups

**Figure 1a.** Estimated means of perceived stress in support exchange groups

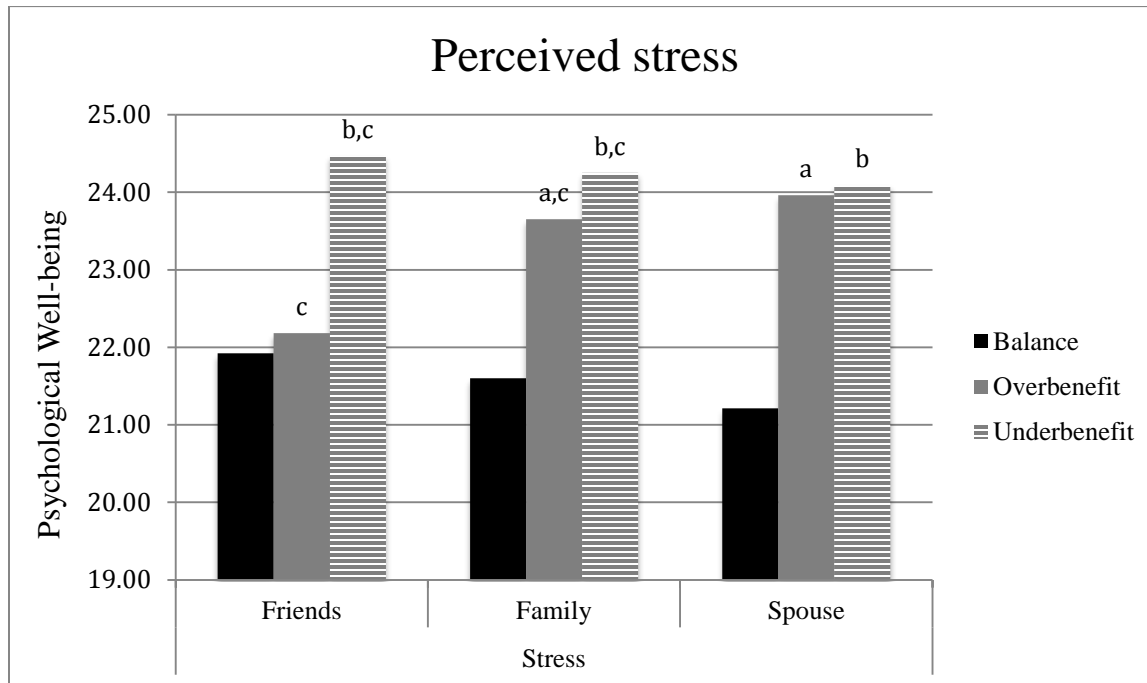

**Figure 1b.** Estimated means of depressive symptoms in support exchange groups

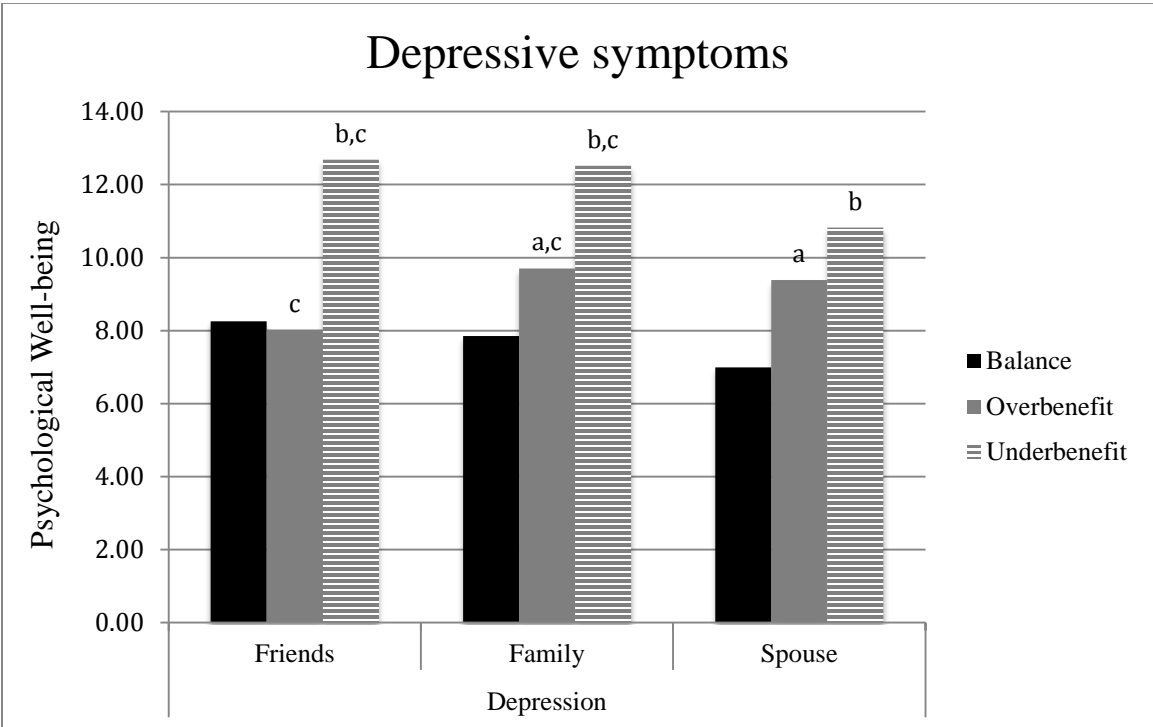

**Figure 1c.** Estimated means of anxiety levels in support exchange groups

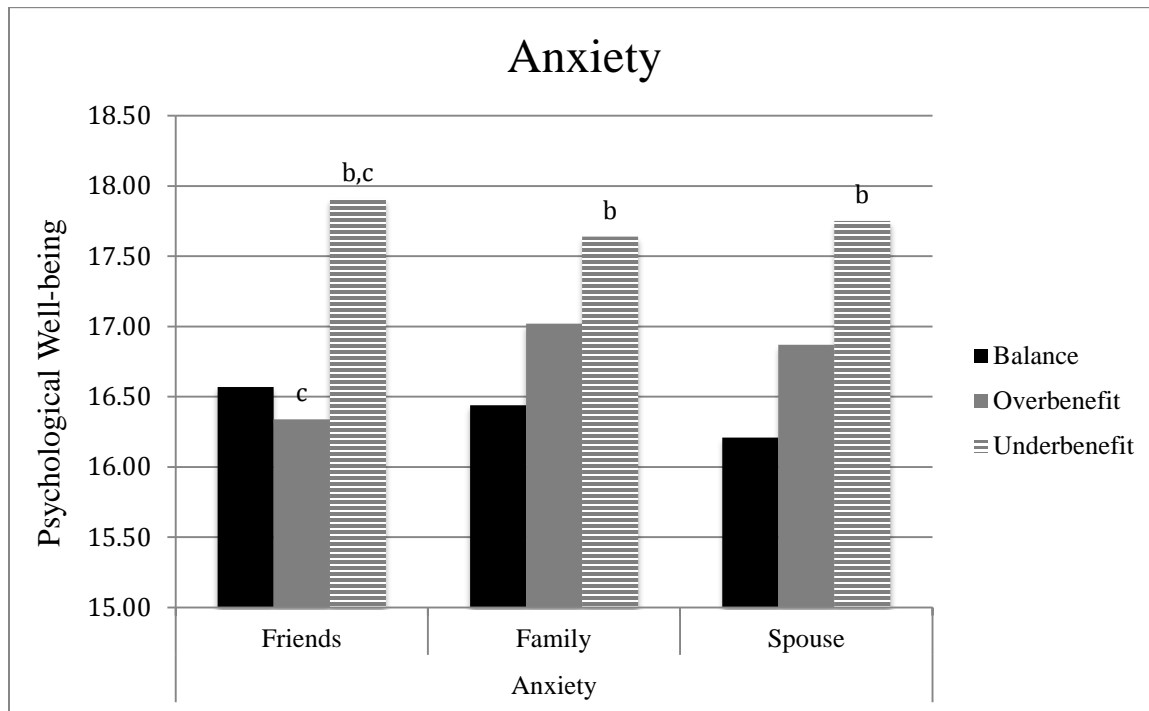

**Figure 1d.** Estimated means of positive affect levels in support exchange groups

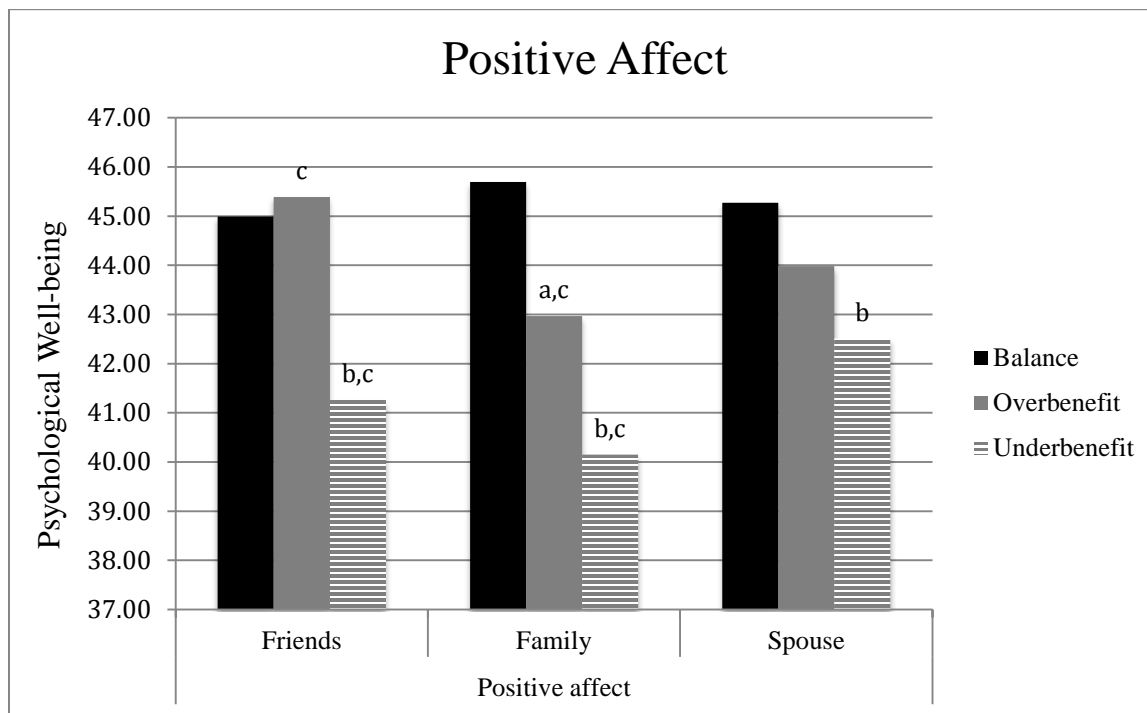

Note: Estimated means of psychological measures in each group are presented, with labels indicating significant mean difference between each group.

- (a) estimated effect of over-benefiting varies from that of balanced
- (b) estimated effect of under-benefiting varies from that of balanced
- (c) estimated effect of under-benefiting varies from that of over-benefiting
